# Supplementary material
Source: publisher figshare collection journal article supplement (https://acs.figshare.com/ndownloader/files/7595200)
Supplement: Supplementary file 1 [file 7595200]

## Sheet: MICH-01-15VW
Supplementary reports (saliva): Report S5: (Saliva) Statistics report
Metabolic markers of head and neck SCC, saliva, MICH-01-15VW
						Fold of Change
Super Pathway	Sub Pathway	Biochemical Name	KEGG	PUBCHEM	HMDB	Disease
						Control
Amino Acid	Glycine, Serine and Threonine Metabolism	glycine	C00037	750	HMDB00123	0.39
		N-acetylglycine		10972	HMDB00532	0.7195
		sarcosine (N-Methylglycine)	C00213	1088	HMDB00271	0.4808
		betaine	C00719	247	HMDB00043	1.122
		serine	C00065	5951	HMDB00187	0.9286
		N-acetylserine		65249	HMDB02931	1.2064
		threonine	C00188	6288	HMDB00167	0.6761
		N-acetylthreonine	C01118	152204		0.8549
		O-acetylhomoserine	C01077	439389		0.5211
	Alanine and Aspartate Metabolism	alanine	C00041	5950	HMDB00161	0.8393
		N-acetylalanine	C02847	88064	HMDB00766	0.9931
		aspartate	C00049	5960	HMDB00191	1.1174
		asparagine	C00152	6267	HMDB00168	0.3709
		N-acetylaspartate (NAA)	C01042	65065	HMDB00812	1.1628
		cyano-alanine	C02512	13538		0.6086
	Glutamate Metabolism	glutamate	C00025	611	HMDB00148	1.2493
		glutamine	C00064	5961	HMDB00641	0.467
		N-acetylglutamate	C00624	70914	HMDB01138	1.3559
		N-acetylglutamine	C02716	182230	HMDB06029	0.4739
		gamma-aminobutyrate (GABA)	C00334	119	HMDB00112	0.504
		pyroglutamine*		134508		1.1374
	Histidine Metabolism	histidine	C00135	6274	HMDB00177	0.4883
		N-acetylhistidine	C02997	75619	HMDB32055	0.6454
		trans-urocanate	C00785	736715	HMDB00301	1.3267
		cis-urocanate		1549103		5.2621
		formiminoglutamate	C00439	439233		1.4978
		imidazole propionate		70630	HMDB02271	0.5342
		imidazole lactate	C05568	440129	HMDB02320	0.7151
		histamine	C00388	774	HMDB00870	0.198
		1-methylimidazoleacetate	C05828	75810	HMDB02820	3.9888
		N-acetylhistamine	C05135	69602	HMDB13253	0.3709
	Lysine Metabolism	lysine	C00047	5962	HMDB00182	0.6232
		N2-acetyllysine	C12989	92907	HMDB00446	1.1894
		N6-acetyllysine	C02727	92832	HMDB00206	0.9321
		N-6-trimethyllysine	C03793	440120	HMDB01325	0.9017
		2-aminoadipate	C00956	469	HMDB00510	1.9597
		glutarate (pentanedioate)	C00489	743	HMDB00661	3.3441
		glutarylcarnitine (C5)		71464488	HMDB13130	2.3297
		pipecolate	C00408	849	HMDB00070	1.5279
		cadaverine	C01672	273	HMDB02322	2.0694
		N-acetyl-cadaverine				2.241
		5-aminovalerate	C00431	138	HMDB03355	0.6929
	Phenylalanine and Tyrosine Metabolism	phenylalanine	C00079	6140	HMDB00159	0.5518
		N-acetylphenylalanine	C03519	74839	HMDB00512	0.6062
		phenylpyruvate	C00166	997	HMDB00205	2.2315
		phenyllactate (PLA)	C05607	3848	HMDB00779	0.8542
		phenylacetate	C07086	999	HMDB00209	1.8521
		4-hydroxyphenylacetate	C00642	127	HMDB00020	0.8854
		phenylacetylglutamine	C04148	92258	HMDB06344	1.4112
		tyrosine	C00082	6057	HMDB00158	0.5103
		N-acetyltyrosine		68310	HMDB00866	0.6629
		tyramine	C00483	5610	HMDB00306	0.1836
		4-hydroxyphenylpyruvate	C01179	979	HMDB00707	0.7171
		3-(4-hydroxyphenyl)lactate	C03672	9378	HMDB00755	0.5343
		phenol sulfate	C02180	74426	HMDB60015	0.5418
		p-cresol sulfate	C01468	4615423	HMDB11635	1.4241
		vanillylmandelate (VMA)	C05584	1245	HMDB00291	1.171
		3-(4-hydroxyphenyl)propionate	C01744	10394	HMDB02199	2.6234
		3-phenylpropionate (hydrocinnamate)	C05629	107	HMDB00764	8.2618
		dopamine sulfate (1)				1.0414
		dopamine sulfate (2)				6.1235
		p-cresol-glucuronide*		154035	HMDB11686	1.4105
		tyramine O-sulfate		153005	HMDB06409	4.6128
		N-formylphenylalanine		759256		0.2525
	Tryptophan Metabolism	tryptophan	C00078	6305	HMDB00929	0.5175
		N-acetyltryptophan	C03137	700653	HMDB13713	0.7206
		indolelactate	C02043	92904	HMDB00671	0.8628
		indoleacetate	C00954	802	HMDB00197	1.1041
		indolepropionate		3744	HMDB02302	2.7618
		3-indoxyl sulfate		10258	HMDB00682	0.5972
		kynurenine	C00328	161166	HMDB00684	2.3361
		kynurenate	C01717	3845	HMDB00715	0.312
		picolinate	C10164	1018	HMDB02243	1.4837
		tryptophan betaine	C09213	442106	HMDB61115	1.209
	Leucine, Isoleucine and Valine Metabolism	leucine	C00123	6106	HMDB00687	0.4965
		N-acetylleucine	C02710	70912	HMDB11756	0.4307
		4-methyl-2-oxopentanoate	C00233	70	HMDB00695	1.1088
		isovalerate	C08262	10430	HMDB00718	6.0673
		isovalerylcarnitine		6426851	HMDB00688	4.2339
		beta-hydroxyisovalerate		69362	HMDB00754	1.1121
		beta-hydroxyisovaleroylcarnitine				1.8154
		alpha-hydroxyisovaleroyl carnitine*				1.8809
		alpha-hydroxyisovalerate		99823	HMDB00407	1.0773
		methylsuccinate		10349	HMDB01844	2.1719
		isoleucine	C00407	6306	HMDB00172	0.4552
		N-acetylisoleucine		2802421		0.5085
		3-methyl-2-oxovalerate	C00671	47	HMDB03736	1.3892
		2-methylbutyrylcarnitine (C5)		6426901	HMDB00378	1.9911
		tiglyl carnitine		22833596	HMDB02366	1.622
		2-hydroxy-3-methylvalerate		164623	HMDB00317	0.7299
		3-hydroxy-2-ethylpropionate		188979	HMDB00396	1.0216
		ethylmalonate		11756	HMDB00622	1.3029
		valine	C00183	6287	HMDB00883	0.8323
		N-acetylvaline		66789	HMDB11757	0.612
		3-methyl-2-oxobutyrate	C00141	49	HMDB00019	1.6553
		isobutyrylcarnitine		168379	HMDB00736	2.2687
		3-hydroxyisobutyrate	C06001	87	HMDB00336	1.2881
		alpha-hydroxyisocaproate	C03264	83697	HMDB00746	0.6634
	Methionine, Cysteine, SAM and Taurine Metabolism	methionine	C00073	6137	HMDB00696	0.8816
		N-acetylmethionine	C02712	448580	HMDB11745	1.0874
		N-formylmethionine	C03145	439750	HMDB01015	1.1193
		methionine sulfoxide	C02989	158980	HMDB02005	0.5519
		alpha-ketobutyrate	C00109	58	HMDB00005	2.1585
		2-aminobutyrate	C02261	439691	HMDB00650	0.719
		2-hydroxybutyrate (AHB)	C05984	440864	HMDB00008	2.0072
		cysteine	C00097	5862	HMDB00574	2.0273
		hypotaurine	C00519	107812	HMDB00965	2.0641
		taurine	C00245	1123	HMDB00251	1.3266
		N-acetyltaurine		159864		0.753
	Urea cycle; Arginine and Proline Metabolism	arginine	C00062	232	HMDB00517	1.422
		urea	C00086	1176	HMDB00294	1.0995
		ornithine	C00077	6262	HMDB03374	0.891
		proline	C00148	145742	HMDB00162	0.646
		citrulline	C00327	9750	HMDB00904	1.3814
		homocitrulline	C02427	65072	HMDB00679	1.2017
		dimethylarginine (SDMA + ADMA)	C03626	123831	HMDB01539	3.6404
		N-acetylarginine	C02562	67427	HMDB04620	0.6502
		N-delta-acetylornithine		9920500		1.1996
		N-methylproline		557		5.7106
		trans-4-hydroxyproline	C01157	5810	HMDB00725	0.4175
		pro-hydroxy-pro		11673055	HMDB06695	0.2768
	Creatine Metabolism	creatine	C00300	586	HMDB00064	1.0524
		creatinine	C00791	588	HMDB00562	0.87
		creatine phosphate	C02305	587	HMDB01511	2.061
		guanidinoacetate	C00581	763	HMDB00128	0.5809
	Polyamine Metabolism	agmatine	C00179	199	HMDB01432	0.0923
		acisoga		129397		1.2745
		putrescine	C00134	1045	HMDB01414	0.532
		spermine	C00750	1103	HMDB01256	7.2008
		spermidine	C00315	1102	HMDB01257	2.2344
		5-methylthioadenosine (MTA)	C00170	439176	HMDB01173	2.7922
		N-acetylputrescine	C02714	122356	HMDB02064	0.6644
		4-acetamidobutanoate	C02946	18189	HMDB03681	0.9709
		1,3-diaminopropane	C00986	428	HMDB00002	0.9916
	Guanidino and Acetamido Metabolism	4-guanidinobutanoate	C01035	500	HMDB03464	1.1801
	Glutathione Metabolism	glutathione, oxidized (GSSG)	C00127	65359	HMDB03337	14.7751
		cysteine-glutathione disulfide		4247235	HMDB00656	2.2616
		cys-gly, oxidized		333293		10.6087
		5-oxoproline	C01879	7405	HMDB00267	0.9531
		ophthalmate		7018721	HMDB05765	1.7166
Peptide	Gamma-glutamyl Amino Acid	gamma-glutamylalanine		440103	HMDB29142	1.4682
		gamma-glutamylglutamate	C05282	92865	HMDB11737	4.3796
		gamma-glutamylglutamine	C05283	150914	HMDB11738	1.5444
		gamma-glutamylisoleucine*		14253342	HMDB11170	0.519
		gamma-glutamylleucine		151023	HMDB11171	0.845
		gamma-glutamylmethionine		7009567	HMDB29155	1.2927
		gamma-glutamylphenylalanine		111299	HMDB00594	2.1596
		gamma-glutamylthreonine*			HMDB29159	1.864
		gamma-glutamylvaline		7015683	HMDB11172	0.7455
	Dipeptide Derivative	carnosine	C00386	439224	HMDB00033	0.4831
		N-acetylcarnosine		9903482	HMDB12881	0.1429
		anserine	C01262	112072	HMDB00194	0.2878
	Dipeptide	alanylleucine		259583	HMDB28691	0.3238
		glutamine-leucine				0.3539
		glycylisoleucine		88079	HMDB28844	0.8184
		glycylleucine	C02155	92843	HMDB00759	0.4788
		glycylvaline		97417	HMDB28854	1.0456
		isoleucylglycine		342532		0.6943
		leucylglycine		79070		0.7072
		lysylleucine		4682588		0.3737
		phenylalanylalanine		6993123;5488196		0.6846
		phenylalanylglycine		98207		0.5851
		prolylglycine		7408076;6426709		0.2864
		threonylphenylalanine		4099799;4099798		3.4374
		valylglutamine		5253209		0.5998
		valylglycine		136487		0.4326
		valylleucine		352039		0.3675
		leucylglutamine*		4305457		0.5177
Carbohydrate	Glycolysis, Gluconeogenesis, and Pyruvate Metabolism	1,5-anhydroglucitol (1,5-AG)	C07326	64960	HMDB02712	1.1773
		glucose	C00031	79025	HMDB00122	0.9786
		glucose 6-phosphate	C00668	5958	HMDB01401	4.5254
		Isobar: fructose 1,6-diphosphate, glucose 1,6-diphosphate, myo-inositol 1,4 or 1,3-diphosphate				8.7268
		2-phosphoglycerate	C00631	59	HMDB03391	3.0097
		3-phosphoglycerate	C00597	724	HMDB00807	4.6309
		phosphoenolpyruvate (PEP)	C00074	1005	HMDB00263	3.9488
		pyruvate	C00022	1060	HMDB00243	1.6411
		lactate	C00186	612	HMDB00190	1.0122
		glycerate	C00258	752	HMDB00139	1.4668
	Pentose Phosphate Pathway	6-phosphogluconate	C00345	91493	HMDB01316	4.6538
	Pentose Metabolism	ribose	C00121	5779	HMDB00283	0.3912
		ribitol	C00474	6912	HMDB00508	0.573
		ribonate	C01685	5460677	HMDB00867	0.6285
		xylonate	C05411	6602431	HMDB60256	0.4279
		xylose	C00181	135191	HMDB00098	0.0475
		xylitol	C00379	6912	HMDB02917	16.199
		threitol	C16884	169019	HMDB04136	0.6926
		arabitol	C01904	94154	HMDB00568	0.638
		fucose	C01018	19466	HMDB00174	0.2044
	Glycogen Metabolism	maltopentaose	C06218	13489094	HMDB12254	26.728
		maltotetraose	C02052	446495	HMDB01296	42.9827
		maltotriose	C01835	439586	HMDB01262	2.6183
		maltose	C00208	10991489	HMDB00163	9.7722
	Disaccharides and Oligosaccharides	lactose	C00243	84571	HMDB00186	1
		lacto-N-tetraose	C06371	440993	HMDB06566	3.8651
		Lewis X trisaccharide		4571095	HMDB06568	0.4104
		sucrose	C00089	5988	HMDB00258	29.8735
	Fructose, Mannose and Galactose Metabolism	fructose	C00095	5984	HMDB00660	0.367
		sorbitol	C00794	5780	HMDB00247	5.6811
		mannitol	C00392	6251	HMDB00765	2.5846
		galactose	C01582	3037556	HMDB00143	0.4627
		galactonate	C00880	128869	HMDB00565	1.6497
	Aminosugar Metabolism	glucuronate	C00191	444791	HMDB00127	0.7894
		N-acetylglucosamine	C00140	24139	HMDB00215	0.7774
		N-acetylneuraminate	C00270	439197	HMDB00230	0.2402
		erythronate*		2781043	HMDB00613	0.888
Energy	TCA Cycle	citrate	C00158	311	HMDB00094	2.6075
		aconitate [cis or trans]	C00417		HMDB00072	1.3195
		isocitrate	C00311	1198	HMDB00193	1.758
		alpha-ketoglutarate	C00026	51	HMDB00208	3.434
		succinylcarnitine				0.9147
		succinate	C00042	1110	HMDB00254	0.8721
		fumarate	C00122	444972	HMDB00134	2.1907
		malate	C00149	525	HMDB00156	3.1601
		tricarballylate	C19806	14925	HMDB31193	0.406
		2-methylcitrate/homocitrate				2.0175
	Oxidative Phosphorylation	phosphate	C00009	1061	HMDB01429	0.7187
Lipid	Short Chain Fatty Acid	valerate	C00803	7991	HMDB00892	2.6176
	Medium Chain Fatty Acid	caproate (6:0)	C01585	8892	HMDB00535	4.83
		heptanoate (7:0)	C17714	8094	HMDB00666	2.1172
		caprylate (8:0)	C06423	379	HMDB00482	2.9139
	Long Chain Fatty Acid	10-heptadecenoate (17:1n7)		5312435	HMDB60038	0.6691
		oleate (18:1n9)	C00712	445639	HMDB00207	0.4394
		eicosenoate (20:1)		5282768	HMDB02231	0.4963
		erucate (22:1n9)	C08316	5281116	HMDB02068	0.4244
	Polyunsaturated Fatty Acid (n3 and n6)	linolenate [alpha or gamma; (18:3n3 or 6)]	C06426	5280934	HMDB03073	1.1068
		arachidonate (20:4n6)	C00219	444899	HMDB01043	0.6638
	Fatty Acid, Branched	isocaproate		12587	HMDB00689	13.1859
	Fatty Acid, Dicarboxylate	2-hydroxyglutarate	C02630	43	HMDB00606	0.9639
		maleate	C01384	444266	HMDB00176	6.1109
		suberate (octanedioate)	C08278	10457	HMDB00893	1.4517
		sebacate (decanedioate)	C08277	5192	HMDB00792	1.4476
		dodecanedioate	C02678	12736	HMDB00623	1.0501
		3-carboxy-4-methyl-5-propyl-2-furanpropanoate (CMPF)		123979	HMDB61112	0.7224
	Fatty Acid, Amide	palmitic amide		69421		0.3161
		oleamide	C19670	5283387	HMDB02117	0.3283
		linoleamide (18:2n6)		6435901		0.3037
	Fatty Acid, Amino	2-aminoheptanoate		227939		1.3876
	Fatty Acid Synthesis	malonylcarnitine		22833583	HMDB02095	0.4217
		malonate	C00383	867	HMDB00691	0.5497
	Fatty Acid Metabolism (also BCAA Metabolism)	butyrylcarnitine	C02862	439829	HMDB02013	3.7493
		propionylcarnitine	C03017	107738	HMDB00824	1.8766
		propionylglycine		98681	HMDB00783	0.4131
		methylmalonate (MMA)	C02170	487	HMDB00202	0.7778
	Fatty Acid Metabolism(Acyl Carnitine)	acetylcarnitine	C02571	1	HMDB00201	1.6516
		hydroxybutyrylcarnitine*		53481617	HMDB13127	3.0637
		hexanoylcarnitine		6426853	HMDB00705	2.1607
		octanoylcarnitine	C02838	123701	HMDB00791	2.0421
		decanoylcarnitine		10245190	HMDB00651	2.005
		cis-4-decenoyl carnitine				1.2132
	Carnitine Metabolism	deoxycarnitine	C01181	134	HMDB01161	0.8447
		carnitine	C00318	10917	HMDB00062	2.1284
	Ketone Bodies	3-hydroxybutyrate (BHBA)	C01089	441	HMDB00357	4.2061
	Fatty Acid, Monohydroxy	4-hydroxybutyrate (GHB)	C00989	10413	HMDB00710	0.4458
		2-hydroxydecanoate		21488		2.2042
		3-hydroxyoctanoate		26613	HMDB01954	2.3134
		13-HODE + 9-HODE		43013		0.647
	Endocannabinoid	palmitoyl ethanolamide	C16512	4671	HMDB02100	0.4535
	Inositol Metabolism	myo-inositol	C00137	892	HMDB00211	0.8311
		scyllo-inositol	C06153	892	HMDB06088	0.2774
		inositol 1-phosphate (I1P)	C04006	440194	HMDB00213	0.4829
	Phospholipid Metabolism	choline	C00114	305	HMDB00097	0.7171
		choline phosphate	C00588	1014	HMDB01565	0.6672
		glycerophosphorylcholine (GPC)	C00670	71920	HMDB00086	0.8077
		ethanolamine	C00189	700	HMDB00149	0.2202
		phosphoethanolamine	C00346	1015	HMDB00224	0.8277
		glycerophosphoethanolamine	C01233	123874	HMDB00114	0.5148
		glycerophosphoinositol*				0.3911
		1-stearoyl-2-oleoyl-GPS (18:0/18:1)		9547087		1.2564
	Lysolipid	1-palmitoyl-GPC (16:0)		86554	HMDB10382	1.2587
		1-stearoyl-GPC (18:0)		497299	HMDB10384	1
		1-oleoyl-GPC (18:1)		16081932	HMDB02815	1.1533
		1-linoleoyl-GPC (18:2)	C04100	11988421	HMDB10386	1
		1-arachidonoyl-GPC (20:4)*	C05208		HMDB10395	1
		1-(1-enyl-palmitoyl)-GPE (P-16:0)*				2.8353
		1-(1-enyl-stearoyl)-GPE (P-18:0)*				1.1403
		1-(1-enyl-oleoyl)-GPE (P-18:1)*				1.1172
		1-palmitoyl-GPE (16:0)		9547069	HMDB11503	0.456
		1-stearoyl-GPE (18:0)		9547068	HMDB11130	1.5437
		1-oleoyl-GPE (18:1)		9547071	HMDB11506	1.6916
		1-linoleoyl-GPE (18:2)*		52925130	HMDB11507	1.5628
		1-arachidonoyl-GPE (20:4)*		42607465	HMDB11517	1.3139
		1-stearoyl-GPI (18:0)			HMDB61696	1.1394
		1-arachidonoyl-GPI (20:4)*			HMDB61690	1
	Glycerolipid Metabolism	glycerol	C00116	753	HMDB00131	1.2346
		glycerol 3-phosphate	C00093	754	HMDB00126	0.764
		glycerophosphoglycerol	C03274	439964		0.5393
	Monoacylglycerol	1-linoleoylglycerol (18:2)		5283469		1.2906
	Sphingolipid Metabolism	palmitoyl sphingomyelin (d18:1/16:0)		9939941		0.7739
		N-acetylsphingosine	C00195	5497136	HMDB04950	0.1182
	Mevalonate Metabolism	3-hydroxy-3-methylglutarate	C03761	1662	HMDB00355	1.1561
		mevalonate	C02104	439230	HMDB00227	1.0478
		mevalonolactone		10428	HMDB06024	1.2374
	Steroid	cortisol	C00735	5754	HMDB00063	7.2697
		cortisone	C00762	222786	HMDB02802	1.5416
		dehydroisoandrosterone sulfate (DHEA-S)	C04555	12594	HMDB01032	0.6551
	Primary Bile Acid Metabolism	glycocholate	C01921	10140	HMDB00138	1.4971
		glycochenodeoxycholate	C05466	12544	HMDB00637	2.6755
Nucleotide	Purine Metabolism, (Hypo)Xanthine/Inosine containing	inosine	C00294	6021	HMDB00195	0.8831
		hypoxanthine	C00262	790	HMDB00157	1.2181
		xanthine	C00385	1188	HMDB00292	0.8937
		xanthosine	C01762	64959	HMDB00299	0.7234
		2'-deoxyinosine	C05512	65058	HMDB00071	0.7243
		urate	C00366	1175	HMDB00289	0.9091
		allantoin	C02350	204	HMDB00462	0.1568
	Purine Metabolism, Adenine containing	adenosine 5'-monophosphate (AMP)	C00020	6083	HMDB00045	11.6248
		adenosine 3'-monophosphate (3'-AMP)	C01367	41211	HMDB03540	7.023
		adenosine 2'-monophosphate (2'-AMP)	C00946	94136	HMDB11617	9.3295
		adenosine 3',5'-cyclic monophosphate (cAMP)	C00575	6076	HMDB00058	0.5805
		adenosine-2',3'-cyclic monophosphate	C02353	2024	HMDB11616	10.3477
		adenosine	C00212	60961	HMDB00050	1.3398
		adenine	C00147	190	HMDB00034	2.7086
		1-methyladenine	C02216	78821	HMDB11599	1.0761
		N1-methyladenosine	C02494	27476	HMDB03331	0.7872
		N6,N6-dimethyladenosine		348206		1.1629
		N6-carbamoylthreonyladenosine		161466	HMDB41623	0.9422
		2'-deoxyadenosine 5'-monophosphate	C00360	12599	HMDB00905	6.652
		2'-deoxyadenosine	C00559	13730	HMDB00101	3.1372
		N6-succinyladenosine			HMDB00912	4.211
	Purine Metabolism, Guanine containing	guanosine 3'-monophosphate (3'-GMP)		3522		5.0679
		guanosine-2',3'-cyclic monophosphate	C06194	92823	HMDB11629	7.7499
		guanosine	C00387	6802	HMDB00133	0.7827
		guanine	C00242	764	HMDB00132	0.7374
		7-methylguanine	C02242	11361	HMDB00897	0.8533
		N1-methylguanosine		96373	HMDB01563	1.0236
		N2,N2-dimethylguanosine		92919	HMDB04824	1.7784
		2'-deoxyguanosine	C00330	187790	HMDB00085	0.8263
		guanosine 2'-monophosphate (2'-GMP)*		444571		9.6828
	Pyrimidine Metabolism, Orotate containing	N-carbamoylaspartate	C00438	93072	HMDB00828	2.7682
		dihydroorotate	C00337	648	HMDB03349	0.1509
		orotate	C00295	967	HMDB00226	0.499
		orotidine	C01103	92751	HMDB00788	0.8105
	Pyrimidine Metabolism, Uracil containing	uridine 5'-diphosphate (UDP)	C00015	6031	HMDB00295	0.9227
		uridine 5'-monophosphate (UMP)	C00105	6030	HMDB00288	4.8979
		uridine 3'-monophosphate (3'-UMP)	C01368	101543		3.5177
		uridine-2',3'-cyclic monophosphate	C02355	439715	HMDB11640	4.675
		uridine	C00299	6029	HMDB00296	1.079
		uracil	C00106	1174	HMDB00300	0.652
		pseudouridine	C02067	15047	HMDB00767	1.1515
		5-methyluridine (ribothymidine)		445408	HMDB00884	0.2484
		5,6-dihydrouracil	C00429	649	HMDB00076	0.9818
		2'-deoxyuridine	C00526	13712	HMDB00012	0.7909
		3-ureidopropionate	C02642	111	HMDB00026	2.4307
		beta-alanine	C00099	239	HMDB00056	0.7072
		N-acetyl-beta-alanine	C01073	76406		1.198
		uridine 2'-monophosphate (2'-UMP)*				5.3192
	Pyrimidine Metabolism, Cytidine containing	cytidine diphosphate	C00112	6132	HMDB01546	1.9252
		cytidine 5'-monophosphate (5'-CMP)	C00055	6131	HMDB00095	4.6197
		cytidine 3'-monophosphate (3'-CMP)	C05822	66535		6.1337
		cytidine 2',3'-cyclic monophosphate	C02354	417654	HMDB11691	8.3591
		cytidine	C00475	6175	HMDB00089	0.7258
		N4-acetylcytidine		107461	HMDB05923	1.0849
		2'-deoxycytidine 5'-monophosphate	C00239	13945	HMDB01202	3.2003
	Pyrimidine Metabolism, Thymine containing	thymidine 5'-monophosphate	C00364	9700	HMDB01227	3.3038
		thymidine	C00214	5789	HMDB00273	0.6085
		thymine	C00178	1135	HMDB00262	0.4082
		5,6-dihydrothymine	C00906	93556	HMDB00079	0.8986
		3-aminoisobutyrate	C05145	64956	HMDB03911	1.4277
Cofactors and Vitamins	Nicotinate and Nicotinamide Metabolism	nicotinate	C00253	938	HMDB01488	2.6132
		nicotinate ribonucleoside	C05841	161234	HMDB06809	1.201
		nicotinamide	C00153	936	HMDB01406	1.7519
		nicotinamide ribonucleotide (NMN)	C00455	14180	HMDB00229	3.6859
		nicotinamide adenine dinucleotide (NAD+)	C00003	5893	HMDB00902	11.0587
		1-methylnicotinamide	C02918	10129985	HMDB00699	1.7457
		trigonelline (N'-methylnicotinate)	C01004	5570	HMDB00875	3.3611
		N1-Methyl-2-pyridone-5-carboxamide	C05842	69698	HMDB04193	1.8992
		adenosine 5'-diphosphoribose (ADP-ribose)	C00301	192	HMDB01178	6.3716
	Riboflavin Metabolism	riboflavin (Vitamin B2)	C00255	493570	HMDB00244	0.4167
		flavin mononucleotide (FMN)	C00061	710	HMDB01520	1.3348
	Pantothenate and CoA Metabolism	pantothenate	C00864	6613	HMDB00210	4.286
	Ascorbate and Aldarate Metabolism	threonate	C01620	151152	HMDB00943	6.6521
		arabonate	C00878	122045	HMDB00539	0.3922
		oxalate (ethanedioate)	C00209	971	HMDB02329	4.7707
		gulonic acid*		9794176		1.0746
	Pterin Metabolism	pterin	C00715	73000	HMDB00802	0.558
	Hemoglobin and Porphyrin Metabolism	heme	C00032	26945	HMDB03178	22.7307
	Vitamin B6 Metabolism	pyridoxate	C00847	6723	HMDB00017	1.2257
Xenobiotics	Benzoate Metabolism	hippurate	C01586	464	HMDB00714	0.4357
		2-hydroxyhippurate (salicylurate)	C07588	10253	HMDB00840	10.7443
		3-hydroxyhippurate		450268	HMDB06116	0.2245
		4-hydroxyhippurate		151012	HMDB13678	1.3544
		benzoate	C00180	243	HMDB01870	2.27
		benzamide	C09815	2331	HMDB04461	13.1169
		4-hydroxybenzoate	C00156	135	HMDB00500	0.8425
		catechol sulfate	C00090	3083879	HMDB59724	0.5085
		O-methylcatechol sulfate		22473		2.0752
		3-methyl catechol sulfate (1)				1.2333
		4-methylcatechol sulfate				0.3982
		p-hydroxybenzaldehyde	C00633	126	HMDB11718	1.7966
		methyl-4-hydroxybenzoate	D01400	7456	HMDB32572	1.3117
		4-vinylphenol sulfate	C05627	6426766	HMDB04072	1
	Xanthine Metabolism	caffeine	C07481	2519	HMDB01847	1.035
		paraxanthine	C13747	4687	HMDB01860	1.0883
		theobromine	C07480	5429	HMDB02825	0.3722
		theophylline	C07130	2153	HMDB01889	0.7139
		1-methylurate	C16359	69726	HMDB03099	3.8794
		1,3-dimethylurate		70346	HMDB01857	0.9308
		1,7-dimethylurate	C16356	91611	HMDB11103	1.0016
		3,7-dimethylurate	C16360	83126	HMDB01982	0.8496
		1,3,7-trimethylurate	C16361	79437	HMDB02123	1.1381
		1-methylxanthine	C16358	80220	HMDB10738	0.6831
		3-methylxanthine	C16357	70639	HMDB01886	0.3189
		7-methylxanthine	C16353	68374	HMDB01991	0.3569
	Tobacco Metabolite	cotinine		854019	HMDB01046	1.1084
		hydroxycotinine		10219774	HMDB01390	1.1269
		cotinine N-oxide		9815514	HMDB01411	1.5296
	Food Component/Plant	2-piperidinone		12665		1.1763
		sucralose	C12285	71485	HMDB31554	2.5568
		levulinate (4-oxovalerate)		11579	HMDB00720	5.2411
		2,3-dihydroxyisovalerate	C04039	677	HMDB12141	1.2587
		2-isopropylmalate	C02504	77	HMDB00402	0.702
		2-oxindole-3-acetate		3080590		1.6456
		3-hydroxyindolin-2-one	C11130	6097		0.2484
		5-hydroxymethylfurfural	C11101	237332	HMDB34355	9.7348
		gluconate	C00257	10690	HMDB00625	0.1869
		N-acetylalliin				1
		aspartame	C11045	134601	HMDB01894	2.1731
		chlorogenate		5315832		3.4734
		cinnamoylglycine		709625	HMDB11621	0.3893
		daidzein	C10208	5281708	HMDB03312	2.8528
		dihydroferulic acid		14340		8.6987
		erythritol	C00503	222285	HMDB02994	3.9541
		homostachydrine*	C08283	441447	HMDB33433	0.8741
		indolin-2-one	C12312	321710		1.4162
		maltitol		3871	HMDB02928	6.1453
		quinate	C00296	6508	HMDB03072	0.9878
		saccharin	D01085	5143	HMDB29723	3.1035
		stachydrine	C10172	115244	HMDB04827	4.5586
		theanine	C01047	439378	HMDB34365	0.9672
		tyrosol	C06044	10393	HMDB04284	0.1859
		pyrraline				0.9923
	Drug	2-hydroxyacetaminophen sulfate*				3.4253
		2-methoxyacetaminophen sulfate*				1.4303
		3-(cystein-S-yl)acetaminophen*		5233914		1.1363
		3-(N-acetyl-L-cystein-S-yl) acetaminophen		83967		1.083
		4-acetaminophen sulfate	C06804	83939	HMDB59911	57.9969
		4-acetamidophenol	C06804	1983	HMDB01859	427.112
		4-acetamidophenylglucuronide		83944	HMDB10316	9.4031
		2-methoxyacetaminophen glucuronide*				1.1021
		2-hydroxyibuprofen				2.3549
		6-oxopiperidine-2-carboxylic acid		3014237		1.0335
		atenolol	D00235	2249	HMDB01924	1.0553
		diphenhydramine	C06960	3100	HMDB01927	3.4736
		escitalopram		146570	HMDB05028	1.1575
		hydroxybupropion		446	HMDB12235	1.0303
		lidocaine	D00358	3676	HMDB14426	1.0756
		metformin	C07151	4091	HMDB01921	1.0289
		naproxen	C01517	156391	HMDB01923	1
		N-ethylglycinexylidide	C16561	24415	HMDB60656	5.7527
		nicotine	C00745	89594	HMDB01934	0.0811
		oxypurinol	D02365	4644	HMDB00786	1
		pseudoephedrine	C02765	7028	HMDB01943	1
		salicylate	C00805	338	HMDB01895	2.9072
		sertraline	C07246	68617	HMDB05010	1
		triamterene	D00386	5546	HMDB01940	1
		warfarin				1.054
		noroxycodone		5489120	HMDB41960	2.5955
		oxycodone	C08018	5284603	HMDB05024	3.5371
		noroxymorphone		5497189	HMDB61073	1.0742
		oxymorphone	D08323,C08019	5284604	HMDB15323	1.1425
	Chemical	pentaethylene glycol		62551		2.1255
		hexaethylene glycol		17472		3.783
		heptaethylene glycol		79718		7.2256
		octaethylene glycol		78798		9.2083
		diglycerol		42953		5.2596
		1,2-propanediol	C00583	1030	HMDB01881	0.7203
		3-hydroxypyridine		7971		1.6834
		nornicotine				0.0689
		2-pyrrolidinone		12025	HMDB02039	1.2291
		sulfate*	C00059	1118	HMDB01448	0.6285
		lauryl sulfate	D01045	8778		6.0438
		O-sulfo-L-tyrosine		514186		0.7471
		2-aminophenol sulfate		181670	HMDB61116	1.038
		S-(3-hydroxypropyl)mercapturic acid (HPMA)		3371179		3.3112
		dexpanthenol	D03726	4678	HMDB04231	1.7248
		dimethyl sulfone	C11142	6213	HMDB04983	2.8816
		succinimide	C07273	11439		1.7857
		triethanolamine	C06771	7618	HMDB32538	9.0553
		N-methylpipecolate		11862129;11286529		1.6831
		MOPS		70807;2723950		0.2014
		1,2,3-benzenetriol sulfate (2)				0.2425
		3-hydroxypyridine sulfate				0.6776
